# Supplementary material for: Adverse events in patients with ankylosing spondylitis treated with TNF inhibitors: a cross-sectional study
Source: Springer Nature journal article supplement (doi:10.1007/s11096-019-00859-7), 2019-06-06
Supplement: MOESM1 [file 16777176]

| Inclusion criteria                                                                                                                                                                                                                                                                                                                                                                                                                                                                                                                                                               | Treatment regimen                                                                                                                                                                                                                                                                                                      | Duration of treatment                                                                                                                                                                                                                                                                                                                                                                                                                                                                                                                                                                                           |
|----------------------------------------------------------------------------------------------------------------------------------------------------------------------------------------------------------------------------------------------------------------------------------------------------------------------------------------------------------------------------------------------------------------------------------------------------------------------------------------------------------------------------------------------------------------------------------|------------------------------------------------------------------------------------------------------------------------------------------------------------------------------------------------------------------------------------------------------------------------------------------------------------------------|-----------------------------------------------------------------------------------------------------------------------------------------------------------------------------------------------------------------------------------------------------------------------------------------------------------------------------------------------------------------------------------------------------------------------------------------------------------------------------------------------------------------------------------------------------------------------------------------------------------------|
| <p>Patients fulfilling the 1984 modified New York criteria of AS.</p> <p>Active disease (BASDAI <math>\geq</math> 4 or ASDAS <math>\geq</math> 2.1 and axial pain <math>\geq</math> 4cm in VAS and physician global assessment <math>\geq</math> 5cm in VAS) for at least 4 weeks with no treatment change.</p> <p>Failure of treatment with at least two NSAIDs at maximum tolerated doses, each used for at least 4 weeks.</p> <p>In individual cases without fulfilling the above criteria if the patient is threatened with a disability or is threatened with his life.</p> | <p>Adalimumab – 40mg SC every 2 weeks</p> <p>Certolizumab –200mg SC every 2 weeks after initial induction (400mg SC at weeks 0,2,4)</p> <p>Etanercept – 50mg SC every week</p> <p>Golimumab – 50mg SC every month</p> <p>Infliximab – 5mg/kg IV every 8 weeks after initial induction (5mg/kg IV at weeks 0, 2, 6)</p> | <p>Between 15 and 18months if the low activity (BASDAI <math>&lt;</math>3 or ASDAS <math>&lt;</math>1,3) is obtained. Treatment can be repeated if after TNFi discontinuation there is a relapse of disease activity. If the relapse is earlier than in 12 weeks after the discontinuation – the treatment dosage and duration is determined by the attending physician.</p> <p>Up to 6 months if the low activity (BASDAI <math>&lt;</math>3 or ASDAS <math>&lt;</math>1,3) is not obtained.</p> <p>Up to 3 months if there is no improvement by 50% or 2 points in BASDAI or in ASDAS by 50% or 1.1 point</p> |
| Exclusion criteria before treatment                                                                                                                                                                                                                                                                                                                                                                                                                                                                                                                                              |                                                                                                                                                                                                                                                                                                                        | Exclusion criteria during treatment                                                                                                                                                                                                                                                                                                                                                                                                                                                                                                                                                                             |
| Contraindications specified in the summary of product characteristics and EULAR / ASAS recommendations.                                                                                                                                                                                                                                                                                                                                                                                                                                                                          |                                                                                                                                                                                                                                                                                                                        | The occurrence of side effects, which in the opinion of the attending physician are contraindications for the treatment with TNFi.                                                                                                                                                                                                                                                                                                                                                                                                                                                                              |

*Supplementary Table 1: Summary of the Polish national therapeutic program for the treatment of ankylosing spondylitis with TNF inhibitors. AS – ankylosing spondylitis, ASAS - Assessment of SpondyloArthritis international Society, ASDAS - Ankylosing Spondylitis Disease Activity Score, BASDAI - Bath Ankylosing Spondylitis Disease Activity Index, EULAR - European League Against Rheumatism, NSAIDs - nonsteroidal anti-inflammatory drugs, TNFi – TNF inhibitors, VAS - visual analogue scale*

|                                                                                                                                                                                                                            | TNFi treatment<br>(n=52) | No TNFi treatment<br>(n=39) | Difference |
|----------------------------------------------------------------------------------------------------------------------------------------------------------------------------------------------------------------------------|--------------------------|-----------------------------|------------|
| number (%) of patients treated with:                                                                                                                                                                                       |                          |                             |            |
| celecoxib                                                                                                                                                                                                                  | 2 (3,85%)                | 3 (7,69%)                   | NS         |
| diclofenac                                                                                                                                                                                                                 | 29 (55,77%)              | 21 (53,85%)                 | NS         |
| ketoprofen                                                                                                                                                                                                                 | 7 (13,46%)               | 3 (7,69%)                   | NS         |
| meloxicam                                                                                                                                                                                                                  | 7 (13,46%)               | 8 (20,51%)                  | NS         |
| naproxen                                                                                                                                                                                                                   | 6 (11,54%)               | 3 (7,69%)                   | NS         |
| nimesulide                                                                                                                                                                                                                 | 1 (1,92%)                | -                           | -          |
| piroxicam                                                                                                                                                                                                                  | -                        | 1 (2,56%)                   | -          |
| The maximum daily dose for treating AS: celecoxib 400mg, diclofenac 150mg, ketoprofen 200mg, meloxicam 15mg, naproxen 1000mg, nimesulide – not recommended, piroxicam 20mg but not recommended as the first line treatment |                          |                             |            |

*Supplementary Table 2: Use of specific nonsteroidal anti-inflammatory drugs and their recommended maximum daily dose in ankylosing spondylitis. AS – ankylosing spondylitis, NS – not significant, NSAIDs - nonsteroidal anti-inflammatory drugs, TNFi – TNF inhibitors*

|                                                     | TNFi treatment    | No TNFi treatment | Difference |
|-----------------------------------------------------|-------------------|-------------------|------------|
| Smoking, number (%)                                 | 15 (14.71%)       | 9 (19.15%)        | NS         |
| mean Pack-year $\pm$ SD                             | 11.94 $\pm$ 12.51 | 10.06 $\pm$ 10.09 | NS         |
| Alcohol consumption                                 |                   |                   |            |
| mean standard drinks per week $\pm$ SD              | 1.9 $\pm$ 4.98    | 2.70 $\pm$ 9.10   | NS         |
| Diabetes, number (%)                                | 1 (0.98%)         | 1 (2.13%)         | NS         |
| COPD or Asthma, number (%)                          | 5 (4.85%)         | 2 (4.26%)         | NS         |
| Hematological treatment, number (%)                 | 1 (0.98%)         | 2 (4.26%)         | NS         |
| Dialysis, number (%)                                | 0                 | 0                 | -          |
| Liver failure, number (%)                           | 0                 | 0                 | -          |
| Tuberculosis infection history, number (%)          | 6 (5.88%)         | 0                 | NS         |
| Tuberculosis exposure history, number (%)           | 10 (9.80%)        | 4 (8.51%)         | NS         |
| HBV infection history, number (%)                   | 2 (1.96%)         | 2 (4.26%)         | NS         |
| Opportunistic infections history, number (%)        | 5 (4.90%)         | 3 (6.38%)         | NS         |
| Influenza vaccination (last year), number (%)       | 6 (5.88%)         | 1 (2.13%)         | NS         |
| Pneumococcal vaccination (last 5 years), number (%) | 1 (0.97%)         | 0                 | NS         |
| Excessive UV exposure, number (%)                   | 19 (18.63%)       | 10 (21.28%)       | NS         |
| Previous EBV infection, number (%)                  | 5 (4.90%)         | 1 (2.13%)         | NS         |
| Previous HPV infection, number (%)                  | 1 (0.98%)         | 4 (8.51%)         | p=0.03450  |
| Close family malignancy history, number (%)         | 47 (46.08%)       | 18 (38.30%)       | NS         |
| Malignancy history, number (%)                      | 1 (0.98%)         | 1 (2.13%)         | NS         |

*Supplementary Table 3: Infection and malignancy risk factors. NS – not significant, TNFi – TNF inhibitors*
